# Supplementary material for: Deposition of silver nanoparticles on nanoscroll-supported inorganic solid using incompletely rolled-up kaolinite
Source: Royal Society of Chemistry journal article supplement (doi:10.1039/d3ra04383e), 2023-01-01
Supplement: d3ra04383e1.pdf [file d3ra04383e1.pdf]

Electrical supporting information

Deposition of silver nanoparticles on nanoscroll-  
supported inorganic solid using incompletely rolled-  
up kaolinite

*Shingo Machida\**

Department of Material Science and Technology, Faculty of Advanced Engineering, Tokyo University

of Science, 6-3-1 Nijuku, Katsushika-ku, Tokyo 125-8585, Japan

\*E-mail: [shingo.machida@rs.tus.ac.jp](mailto:shingo.machida@rs.tus.ac.jp)

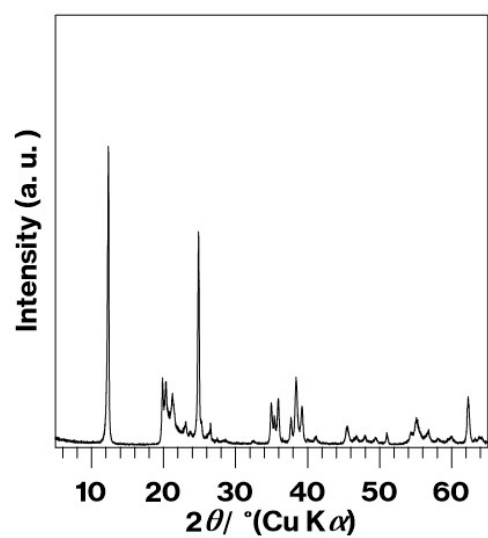

Figure S1. XRD pattern for kaolinite used in this study.

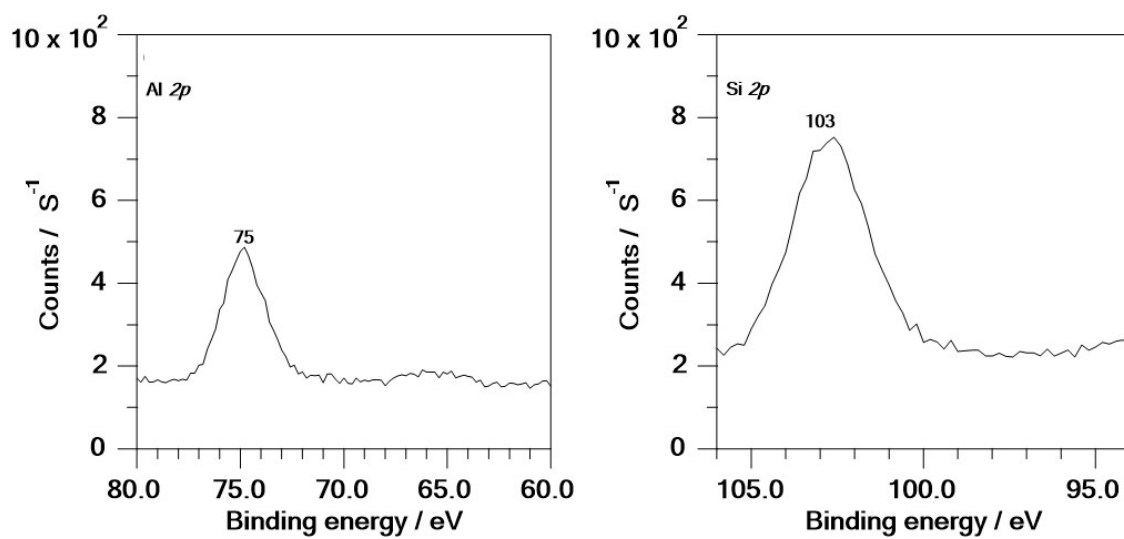

Figure S2 XPS spectra of 0.1Ag-NS-K-C.
